# Supplementary material
Source: publisher site journal article supplement (https://static.cambridge.org/content/id/urn:cambridge.org:id:article:S0022050717000808/resource/name/S0022050717000808_supp1.docx)
Supplement: Supplementary file 1 [file S0022050717000808_supp1.docx]

*Online Appendix*

*The (South) American Dream:
Mobility and Economic Outcomes of First- and Second-Generation Immigrants in Nineteenth-Century Argentina*

# LINKING ALGORITHM

This section describes the procedure implemented to create the sample linking males across the 1869 and 1895 censuses used throughout the article. The procedure is similar in spirit to the one employed in Roy Mill and Luke C.D. Stein (2012). I started by identifying a set of potential matches for each individual in the 1869 census. To be considered a potential match for an 1869 record, a record in the 1895 census had to satisfy the following criteria: (1) Born in the same province of birth (country of birth in the case of the foreign born); (2) same first letter of (standardized) first name; (3) same first letter of (standardized) last name; and (4) born in the same year 5 years.

For those pairs of individuals that met this criteria, I measured their similarity in terms of three identifying variables: first name, last name, and year of birth—estimated based on the reported age in the census. To calculate the similarity in first and last names, I used the Jaro-Winkler string distance (Winkler 1990). The Jaro-Winkler distance is a measure of the similarity between two strings. The measure is normalized such that a score of zero represents two identical strings, and a score of one represents two strings without any common characters. I measured the similarity between the estimated years of birth by computing the absolute value of their difference.

The next step of the procedure is to summarize the distance in first name, last name, and year of birth into a single linking score. There are two main approaches to computing these scores in the literature. The first option is to manually classify a subsample of the potential matches into matches and non-matches and use this subsample to train a classification model. This approach is the one followed by John Parman (2015) and James Feigenbaum (2016). An alternative approach is to compute the linking scores without a training sample. The core intuition of the approach is to assume a statistical distribution for the vector of distances. Then, I find the parameters of that underlying statistical distribution that maximize the probability of observing the distances in the sample. The procedure is similar to the one used in the U.S. Census (Winkler 1988).

Figure A.1 illustrates the data used to create this sample. Panel (a) of this figure shows an Italian immigrant (“Carlos Bonazola") in the 1869 census. Panel (b) shows the same immigrant in the 1895 census.

The procedure used to match immigrants from the passenger lists to the 1895 census had to be adjusted because a substantial fraction of immigrants adopted a Spanish version of their first names while in the country, but yet reported their original names upon arrival. With this in mind, I modified the linking strategy in the following way. In addition to computing the distance in the first names as originally reported, I also computed the distance between a Spanish version of the first name reported upon arrival and the first name in the 1895 census. So, for instance, if an Italian immigrant declared the name “Giuseppe Renzi” upon arrival to Argentina, the Spanish version-based string distance measure would take a value of zero when compared to an Italian named “José Renzi” in the 1895 census. I hence computed the linking score using as inputs four measures of similarity between the records: distance in reported first name, distance in Spanish version of first name, distance in last name and distance in year of birth.

# ACCOUNTING FOR MATCH FAILURE

# There is a trade-off in the linking procedure between efficiency—matching a large fraction of the observations—and accuracy—avoiding incorrect matches. In my baseline sample linking working-age natives and immigrants, I find a match—defined as a potential match with a linking score above the threshold—for about 30percent of the sample and a unique match—defined as a potential match with a linking score that is both above the threshold and sufficiently better than the second-best match ()– for about 10 percent. In the sample linking sons of natives and sons of immigrants, I obtain a match for about 37 percent of the individuals and a unique match for about 12 percent. Mill and Stein (2012) use a similar procedure to linking records and report matching rates that are similar to mine.

# Table A.2 compares the observed matching rates with the predicted matching rates after subtracting mortality, census underenumeration and return migration. I perform the analysis separately for (1) working-age natives, (2) sons, and (3) working-age immigrants. The main reason for match failure is mortality during the intercensal period. Based on the censuses full count, I estimated that about 44 percent of the natives in my 1869 sample were dead by 1895. Hence, the overall matching rate for natives is capped at 56 percent. Estimating the mortality rate for immigrants is harder because there is no information on year of arrival to the country on the census. I hence approximate the mortality rate of immigrants using the mortality rate of natives born in the province of Buenos Aires, which hosted most of the immigrants in my sample. In addition, despite censuses which are intended to be a full count of the population, there is non-trivial underenumeration in historical censuses. I am not aware of estimates of underenumeration in nineteenth-century Argentina censuses, but estimates for a similar time period using U.S. data find underenumeration rates ranging from 7.4 percent to as large as 23 percent (King and Magnuson 1995). An additional source of match failure is return migration. Assuming independence among these three sources of underenumeration, the predicted matching rate ranges from 45 percent to 53 percent for natives and 23 percent to 37 percent for foreigners. The remaining difference between the predicted and the observed matching rate corresponds to errors in the enumeration process that are too severe to be accommodated by my linking procedure. For instance, individuals that misreport their age by more than five years, or that have the first letter of their first name misspelled will be missed by my linking procedure.

# One challenge in linking the passenger lists to the census is that many immigrants changed their first names while in the country. While my linking procedure takes that explicitly into account, I am only able to accommodate name changes in which the immigrant adopted the Spanish version of their first names. Because of this difficulty, the matching rates are lower in this case than in previous case.

#

# COMPARING THE LINKED SAMPLES TO THE POPULATION

I start by comparing working-age immigrants and natives in the linked sample to individuals in the 1869 cross section. To perform this comparison, I take advantage of two nationally representative samples of the 1869 and 1895 censuses compiled by Jorge L. Somoza (1967) using the original census manuscripts. Individuals in the linked sample might differ from individuals in the 1869 census cross-section for two conceptually different sets of reasons. First, there is attrition due to mortality and return migration. These sources of attrition are unrelated to the linking procedure, but are also unlikely to be random. Second, there is attrition directly driven by the linking procedure.

Panel (a) of Table A.4 shows that there are a number of differences between natives in the 1869 census cross-section and natives in the linked sample. The most salient difference is the higher literacy rates of natives in the linked sample. The distribution across regions of Argentina, as well as urban/rural status, are similar across the two samples. In addition, the fraction of individuals by occupational category is also fairly similar, although the white-collar category is overrepresented in the linked sample. Overall, the evidence suggests some degree of positive selection for natives in the linked sample. Panel (b) of Table A.4 repeats the analysis for the working-age foreign born. In this case, the differences between individuals in the linked sample and those in the cross section are quantitatively smaller.

I then compare immigrants and natives in the linked sample to individuals in the 1895 census cross-section. This second comparison has the advantage that, in the case of natives, the survivors in the 1895 census cross-section should be similar to the individuals in my linked sample in the absence of biases introduced by the linking procedure.[[1]](#footnote-1) However, the comparison is problematic for immigrants because the stock of immigrants in 1895 includes more recent arrivals, who might be different from the long-term—arrived before 1869—immigrants who are the subject of my study. Unfortunately, it is not possible to restrict the sample to those immigrants who entered Argentina before a given year, as the 1895 census contains no information on an immigrant’s year of arrival to the country.[[2]](#footnote-2)

Panel (a) of Table A.5 shows that natives in the linked sample look different than natives in the 1895 cross-section along a few dimensions. In particular, they are more likely to be literate and to own property, two characteristics that suggest positive selection of individuals into the linked sample. The distribution of individuals across occupational categories is roughly similar, although, similar to the evidence in Table A.4, individuals in the linked sample are underrepresented in the unskilled category. Panel (b) of Table A.5 also suggests positive selection of immigrants into the linked sample, although in this case the differences could also stem from differences between long-term immigrants and more recent arrivals.

In Table A.6 I compare the fathers—natives and immigrants—of individuals linked to the 1895 census to fathers in the 1869 cross section. In Table A.7, I compare all sons—individuals 26 to 44 years old in 1895—in the linked data to sons in the cross-section.[[3]](#footnote-3) In both cases, the comparison shows a similar pattern to the ones above: individuals in the linked sample are more likely to be literate and more likely to own property. However, the sons of farmers are overrepresented in the linked sample.

In Panel (a) of Table A.8, I compare immigrants in the passenger lists who were matched to an observation in the 1895 census to immigrants who were not. In Panel (b), I compare immigrants in the linked sample in 1895 to immigrants in the 1895 cross section. Immigrants in the passenger lists are older than immigrants in the linked sample, but look similar to them in terms of civil status and occupational categories. The main difference between the linked sample and the cross-section is that immigrants from Spain are overrepresented in the linked sample. This overrepresentation likely reflects the fact that immigrants from Spain did not change their name upon arrival to Argentina and it is hence easier to find them in the 1895 census. Compared to immigrants in the census cross-section (Panel (b) of Table A.8), individuals in the linked sample from passenger lists are younger, more likely to reside in urban locations and underrepresented among farmers.

#

# IDENTIFYING FATHERS AND SONS IN THE DATA

There are two main challenges in identifying fathers and sons in the 1869 census. The first challenge is that not all fathers and sons live in the same household. Sons might have left their childhood household by the time of the census. I minimize this possibility by focusing on children who are young enough (18 years old or younger) in 1869 to presumably still be living with their parents by the time of the census. Second, the father might be either absent or dead at the moment of the census.

A second challenge is that even if fathers co-reside with their sons, the data lack household identifiers. In particular, the 1869 census does not include a question on the relationship of each household member to the head of the household. However, because members of the same household were recorded in the census forms consecutively and father and sons share their last names, it is possible to identify for each individual a set of potential fathers. More precisely, for each male under the age of 18, I identified the set of potential fathers as anyone who met all of the following the criteria: (1) same last name, (2) recorded consecutively in the census forms (either on the same page or in the one immediately before or in the one immediately after), and (3) had an age difference of at least 16 years but no more than 50 years.

The procedure for identifying fathers and sons is similar to the one used by IPUMS to impute relationships among different household members in the 1850, 1860, and 1870 U.S. censuses, where the question on relationship to head of household is also unavailable (Ruggles et al. 1997).

#

# OCCUPATIONS AND EARNINGS DATA

This section describes the sources and assumptions used to compute the occupational earnings measure used throughout the article. This measure varies across but not within occupations and is intended to capture the typical earnings in a given occupation.

##

## *Salaried Workers*

The data on daily wages of blue-collar workers comes from two sources: William I. Buchanan (1898) and the 1881 census of the province of Buenos Aires (Provincia de Buenos Aires 1883). Buchanan was the economic aggregate of the U.S. Embassy in Buenos Aires and systematically collected wage data for workers in this city. His report contains yearly information on the typical wages on 95 occupations from 1886 to 1896. These data have been used extensively in historical research (Dorfman 1942; Panettieri 1965; Panettieri 1998) and are considered to be accurate (Conde 1979). In particular, for each of the occupations in the Buchanan’s data, I take a simple average of the wages in 1894 and 1896. I complement these data with the 1881 census of the Province of Buenos Aires, which contains information from this province on the wages in 65 different occupations.

Because of its greater level of detail and the availability of data closer to 1895, my baseline results use the information from Buchanan (1898) to assign a wage to those occupations in which this information is available from both Buchanan (1898) and the 1881 census. In those cases where the information is only available in the 1881 census, I use wages in the census scaled—to account for changes in the price level that took place over this time period—by the mean wage in Buchanan (1898).

The data on the wages of public employees comes from the 1893 national census of public employees, which contains the full roster of public employees and their corresponding monthly wages (Argentina, Dirección General de Estadistica 1895). I computed average wages in the public sector by dividing the sum of the wages of male public employees by their total number.

Wages in the above sources were sometimes reported on a monthly basis. In these cases, I converted the data to daily values by dividing the monthly wage by 25 working days.

##

## *Business Owners*

To estimate the average income of storekeepers—“comerciantes”—I complemented the wage data with information on the size of the capital stock in the commercial sector, obtained from the third volume of the 1895 national census (Fuente 1898). Conceptually, the earnings of a storekeeper could be decomposed into the returns to capital and the returns to labor. Based on this insight, average occupational earnings were computed as the sum of the earnings of a store clerk—the returns to labor—and the estimated per capita returns to capital, assuming an 8 percent net annual return on capital.[[4]](#footnote-4) I computed per capita capital as the ratio between the total capital stock in the commercial sector—as reported in the census—and the total number of individuals who declared working as shopkeepers in the census More precisely, earnings of shopkeepers were estimated as:

Average earnings of the owners of industrial firms—“industriales” and “fabricantes” in the census—were similarly estimated by adding the labor income—in this case, the earnings of a foreman—and the returns to capital in the industrial sector. Data on capital in the industrial sector is also from the 1895 national census.

##

## *Farmers*

Farmers constitute the most challenging category to measure typical earnings. I estimated the income of farmers using the following procedure. I first divided farmers in the agricultural sector into two groups: (1) *hacendados* and *estancieros* and (2) *agricultores*. The *hacendados* category corresponds to those holding the largest plots of land. Overall, less than 10 percent of all the farmers in my sample are in the *hacendados* category. The second group in the agricultural sector, *agricultores*, encompasses the vast majority of farmers. I then estimated the earnings of farmers using the information provided in the Congressional report of the farming sector prepared by Correa and Lahitte (1898). This report includes information on the typical revenue and expenditure in inputs of farms of different size.

##

## *Others*

Finally, I assigned the mean earnings within their corresponding HISCLASS to those occupations for which I could not find information in the above sources. Table A.9 shows the share of observations in the sample linking the 1869 and 1895 censuses that correspond to each of the above data sources in my sample linking working-age natives and immigrants across the 1869 and 1895 censuses.

# REFERENCES

Argentina, Dirección General de Estadistica. *Censo de Los Empleados Administrativos, Funcionarios Judiciales Personal Docente de La República Argentina Correspondiente Al 31 de Diciembre de 1894*. Compañia sud-americana de billetes de banco, 1895.

Álvarez, Beatriz, and Esteban Alberto Nicolini. “Income Inequality in the North-West of Argentina During the First Globalization. Methodology and Preliminary Results.” *Ponencia Presentada En II Encuentro Anual de La Asociación Española de Historia Económica. Madrid* 8, (2010).

Buchanan, William I. “La Moneda Y La Vida En La República Argentina.” *Cuadernos Del CISH* 3, no. 4 (1998).

Conde, Roberto Cortés. “El Progreso Argentino: 1880–1914.” Editorial Sudamericana, 1979.

Correa, Antonio M., and Emilio Lahitte. “Investigación Parlamentaria Sobre Agricultura, Ganadería, Industrias Derivadas Y Colonización.” *Anexo B, Buenos Aires*, 1898.

Dorfman, Adolfo. *Evolución Industrial Argentina*. Buenos Aries: Losada, Biblioteca de Estudios Económicos, 1942.

Feigenbaum, James J. “Intergenerational Mobility during the Great Depression.”Mimeo, 2016.

Fuente, Diego Gregorio de la. *Segundo Censo de La República Argentina, Mayo 10 de 1895*. Vol. 3. Taller tip. de la Penitenciaria nacional, 1898.

King, Miriam L., and Diana L. Magnuson. “Perspectives on Historical Us Census Undercounts.” *Social Science History* 19, no. 4 (1995): 455–66.

Mill, Roy, and Luke C.D. Stein. “Race, Skin Color, and Economic Outcomes in Early Twentieth-Century America.” Working Paper, Stanford University, Stanford, CA, 30 December 2012.

Panettieri, José. “Los Trabajadores En Tiempos de La Inmigración Masiva En Argentina 1870–1910.” Ph.D. Thesis, Facultad de Humanidades y Ciencias de la Educación, 1965.

———. “El Informe Buchanan: Primer Estudio Sobre Salarios Y Precios En La Argentina, 1886/1896.” *Sociohistórica* 3, no. 4 (1998).

Parman, John. “Childhood Health and Sibling Outcomes: Nurture Reinforcing Nature during the 1918 Influenza Pandemic.” *Explorations in Economic History* 58, issue C (2015): 22–43.

Provincia de Buenos Aires. “Censo General de La Provincia de Buenos Aires, 1881.” *Buenos Aires*: 239. 1883.

Ruggles, Steven, Matthew Sobek, Catherine A. Fitch, et al. *Integrated Public Use Microdata Series: Version 2.0*. Historical Census Projects, Department of History, University of Minnesota, 1997.

Somoza, Jorge L. *Muestras de Los Dos Primeros Censos Nacionales de Población, 1869 Y 1895*. 46. Buenos Aries: Instituto Torcuato Di Tella, Centro de Investigaciones Sociales, 1967.

Winkler, William E. “Using the Em Algorithm for Weight Computation in the Fellegi-Sunter Model of Record Linkage.” In *Proceedings of the Section on Survey Research Methods, American Statistical Association*, 667–71. Washington: American Statistical Association, 1988.

———. “String Comparator Metrics and Enhanced Decision Rules in the Fellegi-Sunter Model of Record Linkage.” *ERIC*, 1990.

Table A.1

MATCHING RATE BY COUNTRY OF ORIGIN, 1869 TO 1895 CENSUSES

(a) Working-Age Individuals

| Country of Origin | N | Matched | Uniquely Matched | Matched (Percent) | Uniquely Matched (Percent) |
| --- | --- | --- | --- | --- | --- |
|
| England | 2,861 | 274 | 159 | 0.096 | 0.056 |
| France | 11,342 | 2,662 | 975 | 0.235 | 0.086 |
| Germany | 1815 | 165 | 134 | 0.091 | 0.074 |
| Italy | 25,851 | 10,231 | 2,728 | 0.396 | 0.106 |
| Spain | 15,065 | 5,368 | 1,638 | 0.356 | 0.109 |
| Switzerland | 1821 | 234 | 190 | 0.129 | 0.104 |
| Total | 58,755 | 18,934 | 5,824 | 0.322 | 0.099 |
| Natives | 182,982 | 48,593 | 17,352 | 0.266 | 0.095 |

(b) Sons

| Country of Origin | N | Matched | Uniquely | Matched | Uniquely Matched |
| --- | --- | --- | --- | --- | --- |
|
| England | 1,189 | 313 | 154 | 0.263 | 0.13 |
| France | 5,310 | 1,723 | 733 | 0.324 | 0.138 |
| Germany | 740 | 192 | 123 | 0.259 | 0.166 |
| Italy | 9,481 | 3,481 | 1,350 | 0.367 | 0.142 |
| Spain | 5,629 | 2,270 | 663 | 0.403 | 0.118 |
| Switzerland | 583 | 139 | 86 | 0.238 | 0.148 |
| Total | 22,932 | 8,118 | 3,109 | 0.354 | 0.136 |
| Natives | 183,532 | 71,141 | 21,241 | 0.388 | 0.116 |

*Notes*: This table computes the matching rates in the sample linking the 1869 and 1895 censuses of population. In Panel (a), I compute the matching rate among working-age individuals (18 to 35 years old in 1869) and in Panel (b) I repeat the same for the sample of sons (aged 17 years old or less in 1869). In both cases, I compute the matching rate separately for each of the countries of origin included in my sample.

*Sources*: Data are from the sample of linked census records, as described in the text and Online Appendix.

Table A.2

Accounting for match failure, 1869 to 1895 censuses

|  | Natives | | Foreigners |
| --- | --- | --- | --- |
| < 18 years old | ≥ 18 years old |  |
| (1) | (2) | (3) |
|  |  |  |  |
| Mortality | 0.42 | 0.42 | 0.25 |
| Census underenumeration | 0.9–0.22 | 0.9–0.22 | 0.9–0.22 |
| Return migration | . | . | 0.3–0.5 |
| Predicted matching rate | 0.45–0.53 | 0.45–0.53 | 0.29–0.48 |
| Share matched | 0.36 | 0.27 | 0.32 |
| Share uniquely matched | 0.11 | 0.09 | 0.10 |

*Notes*: This table reports the reasons for match failure in the sample linking the 1869 and 1895 censuses. The predicted matching rate is computed assuming independence among the factors leading to match failure. Mortality is estimated based on the census data and using only the observations corresponding to natives in the relevant age cohort. Return migration estimates are from Alsina (1898). Estimates of census underenumeration are based on estimates from the United States spanning the same time period (Knights 1991), as no references were found for the case of Argentina.

*Sources*: Data are from the sample of linked census records, as described in the text and Online Appendix

Table A.3

MATCHING RATE BY COUNTRY OF ORIGIN,
PASSENGER LISTS TO 1895 CENSUS

| Country of Birth | N | Matched | Uniquely Matched | Matched (Percent) | Uniquely Matched P) |
| --- | --- | --- | --- | --- | --- |
|
| England | 2,499 | 90 | 63 | 0.036 | 0.025 |
| France | 9,857 | 568 | 416 | 0.058 | 0.042 |
| Germany | 2,187 | 95 | 82 | 0.043 | 0.037 |
| Italy | 27,023 | 2,378 | 1,390 | 0.088 | 0.051 |
| Spain | 11,045 | 3,799 | 1,164 | 0.344 | 0.105 |
| Switzerland | 1,425 | 53 | 42 | 0.037 | 0.029 |
| Total | 54,036 | 6,983 | 3,157 | 0.129 | 0.058 |

*Notes*: The sample includes men at least 18 years old upon arrival and that would be at most 60 by 1895. The number of matched cases refers to men who were matched to an observation in the 1895 census. Men are classified as unique if they are unique in the passenger lists by their combination of name, country of birth and age.

*Sources*: Data are from the sample of linked census records, as described in the text and Online Appendix.

Table A.4

LINKED SAMPLE AND CROSS-SECTIONAL DATA, 1869 CENSUS

(a) Working-Age Natives

|  | Cross Section | Panel | p-val |
| --- | --- | --- | --- |
| Variable | (1) | (2) | (3) |
| *I: Demographic* |  |  |  |
| Age | 25.23 | 25.29 | 0.44 |
| Literate | 0.26 | 0.39 | 0.00 |
| *II: Place of residence* |  |  |  |
| Urban | 0.28 | 0.29 | 0.12 |
| East | 0.46 | 0.44 | 0.02 |
| West | 0.10 | 0.14 | 0.00 |
| North | 0.44 | 0.42 | 0.02 |
| *III: Occupation* |  |  |  |
| White collar | 0.11 | 0.14 | 0.00 |
| Farmer | 0.38 | 0.37 | 0.17 |
| Skilled/semiskilled | 0.18 | 0.17 | 0.07 |
| Unskilled | 0.33 | 0.32 | 0.05 |
| Observations | 10,530 | 6,908 |  |

(b) Working-Age Immigrants

|  | Cross section | Panel | p-val |
| --- | --- | --- | --- |
| Variable | (1) | (2) | (3) |
| *I: Demographic* |  |  |  |
| Age | 26.67 | 26.34 | 0.00 |
| Literate | 0.65 | 0.67 | 0.00 |
| *II: Place of residence* |  |  |  |
| Urban | 0.70 | 0.70 | 0.72 |
| East | 0.98 | 0.97 | 0.07 |
| West | 0.00 | 0.00 | 0.40 |
| North | 0.02 | 0.03 | 0.02 |
| *III: Occupation* |  |  |  |
| White collar | 0.22 | 0.23 | 0.38 |
| Farmer | 0.12 | 0.09 | 0.00 |
| Skilled/semiskilled | 0.38 | 0.35 | 0.01 |
| Unskilled | 0.28 | 0.32 | 0.00 |
| *IV: Country of birth* |  |  |  |
| England | 0.05 | 0.03 | 0.00 |
| France | 0.18 | 0.17 | 0.16 |
| Germany | 0.03 | 0.02 | 0.00 |
| Italy | 0.47 | 0.47 | 0.65 |
| Spain | 0.26 | 0.28 | 0.04 |
| Switzerland | 0.00 | 0.03 | 0.00 |
| Observations | 3,477 | 5,210 |  |

*Notes*: Panel (a) compares working-age natives in the sample linking the 1869 and 1895 censuses to working-age natives in the 1869 census cross-section. Panel (b) repeats the same exercise for the working-age foreign born.

*Sources*: Panel data are from the sample of linked census records, as described in the text and Online Appendix. Cross-sectional data are from Somoza (1967).

Table A.5

LINKED SAMPLE AND CROSS-SECTIONAL DATA, 1895 CENSUS

(a) Working-Age Natives

|  | Cross Section | | Panel | p-val |
| --- | --- | --- | --- | --- |
| Variable | (1) | (2) | | (3) |
| *I: Demographic* |  |  | |  |
| Age | 50.48 | 51.10 | | 0.00 |
| Literate | 0.37 | 0.46 | | 0.00 |
| *II: Place of residence* |  |  | |  |
| Urban | 0.23 | 0.26 | | 0.00 |
| East | 0.52 | 0.44 | | 0.00 |
| West | 0.11 | 0.14 | | 0.00 |
| North | 0.37 | 0.42 | | 0.00 |
| South | 0.01 | 0.00 | | 0.12 |
| *III: Property* |  |  | |  |
| Owns property | 0.41 | 0.51 | | 0.00 |
| *IV: Occupation* |  |  | |  |
| White collar | 0.14 | 0.16 | | 0.02 |
| Farmer | 0.50 | 0.51 | | 0.71 |
| Skilled/semiskilled | 0.11 | 0.12 | | 0.06 |
| Unskilled | 0.25 | 0.21 | | 0.00 |
| Observations | 2,904 | 6,854 | |  |

(b) Working-Age Immigrants

|  | Cross Section | Panel | p-val |
| --- | --- | --- | --- |
| Variable | (1) | (2) | (3) |
| *I: Demographic* |  |  |  |
| Age | 49.82 | 51.99 | 0.00 |
| Literate | 0.72 | 0.76 | 0.00 |
| *II: Place of residence* |  |  |  |
| Urban | 0.61 | 0.66 | 0.00 |
| East | 0.94 | 0.95 | 0.56 |
| West | 0.02 | 0.01 | 0.08 |
| North | 0.03 | 0.04 | 0.22 |
| South | 0.01 | 0.00 | 0.02 |
| *III: Property* |  |  |  |
| Owns property | 0.30 | 0.47 | 0.00 |
| *IV: Occupation* |  |  |  |
| White collar | 0.26 | 0.33 | 0.00 |
| Farmer | 0.28 | 0.23 | 0.00 |
| Skilled/semiskilled | 0.27 | 0.26 | 0.61 |
| Unskilled | 0.19 | 0.18 | 0.42 |
| V*: Country of birth* |  |  |  |
| England | 0.03 | 0.03 | 0.05 |
| France | 0.13 | 0.17 | 0.00 |
| Germany | 0.02 | 0.02 | 0.29 |
| Italy | 0.58 | 0.47 | 0.00 |
| Spain | 0.23 | 0.28 | 0.00 |
| Switzerland | 0.00 | 0.04 | 0.00 |
| Observations | 2,976 | 4,889 |  |

*Notes*: Panel (a) compares working-age natives in the sample linking the 1869 and 1895 censuses to natives in the 1895 census cross-section. Panel (b) repeats the same exercise for the working-age foreign born. The census cross-section corresponds to the sample described in Somoza (1967).

*Sources*: Panel data are from the sample of linked census records, as described in the text and Online Appendix. Cross-sectional data are from Somoza (1967).

Table A.6

LINKED SAMPLE AND CROSS-SECTIONAL DATA,
1869 CENSUS, FATHERS

(a) Native Fathers

|  | Cross Section | Panel | p-val |
| --- | --- | --- | --- |
| Variable | (1) | (2) | (3) |
| *I: Demographic* |  |  |  |
| Age | 35.34 | 38.58 | 0.00 |
| Literate | 0.26 | 0.33 | 0.00 |
| *II: Place of residence* |  |  |  |
| Urban | 0.27 | 0.26 | 0.00 |
| East | 0.47 | 0.44 | 0.00 |
| West | 0.11 | 0.14 | 0.00 |
| North | 0.42 | 0.42 | 0.90 |
| *III: Occupation* |  |  |  |
| White collar | 0.10 | 0.12 | 0.00 |
| Farmer | 0.45 | 0.53 | 0.00 |
| Skilled/semiskilled | 0.17 | 0.15 | 0.00 |
| Unskilled | 0.28 | 0.20 | 0.00 |
| Observations | 15,577 | 19,367 |  |

(b) Immigrant Fathers

|  | Cross Section | Panel | p-val |
| --- | --- | --- | --- |
| Variable | (1) | (2) | (3) |
| *I: Demographic* |  |  |  |
| Age | 34.06 | 40.02 | 0.00 |
| Literate | 0.63 | 0.67 | 0.00 |
| *II: Place of residence* |  |  |  |
| Urban | 0.70 | 0.67 | 0.00 |
| East | 0.97 | 0.95 | 0.00 |
| West | 0.01 | 0.01 | 0.72 |
| North | 0.02 | 0.04 | 0.00 |
| *III: Occupation* |  |  |  |
| White collar | 0.22 | 0.29 | 0.00 |
| Farmer | 0.15 | 0.21 | 0.00 |
| Skilled/semiskilled | 0.38 | 0.32 | 0.00 |
| Unskilled | 0.25 | 0.18 | 0.00 |
| *IV: Country of birth* |  |  |  |
| England | 0.05 | 0.04 | 0.03 |
| France | 0.20 | 0.22 | 0.00 |
| Germany | 0.03 | 0.04 | 0.13 |
| Italy | 0.47 | 0.46 | 0.33 |
| Spain | 0.25 | 0.19 | 0.00 |
| Observations | 5,242 | 3,643 |  |

*Notes*: Panel (a) compares the native fathers in the sample linking the 1869 and 1895 censuses to natives in the 1869 census cross-section. Panel (b) repeats the same exercise for the foreign-born fathers.

*Sources*: Panel data are from the sample of linked census records, as described in the text and Online Appendix. Cross-sectional data are from Somoza (1967).

Table A.7

LINKED SAMPLE AND CROSS-SECTIONAL DATA,
1895 CENSUS, SONS

|  | Cross Section | Panel | p-val |
| --- | --- | --- | --- |
| Variable | (1) | (2) | (3) |
| I*: Demographic* |  |  |  |
| Age | 33.96 | 33.08 | 0.00 |
| Literate | 0.48 | 0.57 | 0.00 |
| *II: Place of residence* |  |  |  |
| Urban | 0.28 | 0.31 | 0.00 |
| East | 0.54 | 0.53 | 0.02 |
| West | 0.09 | 0.11 | 0.00 |
| North | 0.36 | 0.36 | 0.89 |
| South | 0.01 | 0.00 | 0.00 |
| *III: Property* |  |  |  |
| Owns property | 0.27 | 0.34 | 0.00 |
| *IV: Occupation* |  |  |  |
| White collar | 0.18 | 0.21 | 0.00 |
| Farmer | 0.38 | 0.37 | 0.33 |
| Skilled/semiskilled | 0.12 | 0.15 | 0.00 |
| Unskilled | 0.32 | 0.28 | 0.00 |
| Observations | 5,966 | 21,635 |  |

*Notes*: This table compares sons in the linked sample to sons in the 1895 census cross-section. Note that, because the census cross-section does not include information on parental place of birth, it is not possible to perform this analysis separately for sons of natives and sons of immigrants.

*Sources*: Panel data are from the sample of linked census records, as described in the text and Online Appendix. Cross-sectional data are from Somoza (1967).

Table A.8

LINKED SAMPLE AND CROSS-SECTIONAL DATA,
PASSENGER LISTS TO 1895 CENSUS

1. Passenger Lists

|  | Cross Section | Panel | p-val |
| --- | --- | --- | --- |
| Variable | (1) | (2) | (3) |
| I*: Demographic* |  |  |  |
| Age | 32.40 | 31.59 | 0.00 |
| Married | 0.39 | 0.40 | 0.26 |
| *II: Occupation* |  |  |  |
| White collar | 0.11 | 0.12 | 0.06 |
| Farmer | 0.35 | 0.34 | 0.39 |
| Skilled/semiskilled | 0.20 | 0.21 | 0.37 |
| Unskilled | 0.28 | 0.28 | 0.74 |
| *II: Country of birth* |  |  |  |
| England | 0.05 | 0.02 | 0.00 |
| France | 0.18 | 0.14 | 0.00 |
| Germany | 0.04 | 0.03 | 0.00 |
| Italy | 0.50 | 0.45 | 0.00 |
| Spain | 0.20 | 0.35 | 0.00 |
| Observations | 52,892 | 2,497 |  |

1. 1895 Census

|  | Cross Section | Panel | p-val |
| --- | --- | --- | --- |
| Variable | (1) | (2) | (3) |
| *I: Demographic* |  |  |  |
| Age | 39.82 | 39.00 | 0.00 |
| Literate | 0.77 | 0.84 | 0.00 |
| *II: Place of residence* |  |  |  |
| Urban | 0.62 | 0.72 | 0.00 |
| East | 0.94 | 0.93 | 0.01 |
| West | 0.02 | 0.02 | 0.17 |
| North | 0.04 | 0.04 | 0.07 |
| South | 0.01 | 0.01 | 0.36 |
| *III: Property* |  |  |  |
| Owns property | 0.21 | 0.22 | 0.68 |
| *IV: Occupation* |  |  |  |
| White collar | 0.26 | 0.29 | 0.00 |
| Farmer | 0.23 | 0.15 | 0.00 |
| Skilled/semiskilled | 0.27 | 0.32 | 0.00 |
| Unskilled | 0.19 | 0.18 | 0.14 |
| *V: Country of birth* |  |  |  |
| England | 0.03 | 0.02 | 0.00 |
| France | 0.11 | 0.14 | 0.00 |
| Germany | 0.02 | 0.03 | 0.05 |
| Italy | 0.59 | 0.45 | 0.00 |
| Spain | 0.24 | 0.35 | 0.00 |
| Observations | 9,005 | 2,529 |  |

*Notes*: Panel (a) compares immigrants in the linked sample to immigrants in the passenger lists. Panel (b) compares immigrants in the linked sample to immigrants in the 1895 census.

*Sources*: Panel data are from the sample of linked passenger list records, as described in the text and Online Appendix. Cross-sectional data are from Somoza (1967).

Table A.9

SOURCES OF INCOME DATA, 1869 TO 1895 CENSUS SAMPLE
(WORKING-AGE)

| Source | N | Percent |
| --- | --- | --- |
| Buchanan (1898) | 8,463 | 32.12 |
| Pcia. de Buenos Aires census (1881) | 1,836 | 6.97 |
| National census (1895) | 2,998 | 11.38 |
| Census of public employees (1894) | 171 | 0.65 |
| Correa and Lahitte (1898) | 7,457 | 28.3 |
| Imputed based on HISCLASS | 5,424 | 20.59 |
| Total observations | 26,349 | 100 |

*Notes*: This table describes the sources used to assign an earnings score to each of the occupations in the sample linking working-age males across the 1869 and 1895 censuses.

*Sources*: Data are from the sample of linked census records, as described in the text and Online Appendix.

1. 1869 Census
2. 1895 Census

Figure A.1

ILLUSTRATION OF THE LINKING PROCEDURE: AN ITALIAN IMMIGRANT IN 1869 AND 1895

*Notes*:This figure shows the same Italian immigrant as in the previous figure but in the 1895 census. He now works as a “comerciante” (shopkeeper).

*Sources*: FamilySearch.org.

# ADDITIONAL TABLES

Table B.1

OCCUPATIONAL MOBILITY OF MOVERS AND STAYERS,
1869 (ROWS) AND 1895 (COLUMNS)

(a) Stayers

| Fathers, 1869 | White Collar | Farmer | Skilled/ Semi-Skilled | Unskilled | Total |
| --- | --- | --- | --- | --- | --- |
| White collar | 0.73 | 0.10 | 0.11 | 0.06 | 100 |
|  | (348) | (49) | (53) | (28) | (478) |
| Farmer | 0.17 | 0.62 | 0.12 | 0.09 | 100 |
|  | (24) | (87) | (17) | (13) | (141) |
| Skilled/semi-skilled | 0.36 | 0.03 | 0.50 | 0.11 | 100 |
|  | (252) | (22) | (346) | (77) | (697) |
| Unskilled | 0.31 | 0.14 | 0.27 | 0.29 | 100 |
|  | (127) | (56) | (110) | (119) | (412) |
| Total | 0.43 | 0.12 | 0.3 | 0.14 | 100 |
|  | (751) | (214) | (526) | (237) | (1,728) |

(b) Movers

| Fathers, 1869 | White Collar | Farmer | Skilled/ Semi-Skilled | Unskilled | Total |
| --- | --- | --- | --- | --- | --- |
| White collar | 0.45 | 0.25 | 0.14 | 0.16 | 100 |
|  | (265) | (147) | (85) | (92) | (589) |
| Farmer | 0.19 | 0.4 | 0.18 | 0.23 | 100 |
|  | (54) | (117) | (51) | (68) | (290) |
| Skilled/semi-skilled | 0.23 | 0.23 | 0.36 | 0.17 | 100 |
|  | (222) | (225) | (345) | (168) | (960) |
| Unskilled | 0.19 | 0.32 | 0.21 | 0.27 | 100 |
|  | (211) | (348) | (232) | (292) | (1,083) |
| Total | 0.26 | 0.29 | 0.24 | 0.21 | 100 |
|  | (752) | (837) | (713) | (620) | (2,922) |

(c) Summary Measures of Mobility

|  | M | d(P,J) | d(Q,J) | d(P,Q) | d(P, Q)i |
| --- | --- | --- | --- | --- | --- |
| (1) | (2) | (3) | (4) | (5) |
| Stayers (P) | 0.48 | 22.52 *** |  | 16.19 *** | 7.41 * |
| Movers (Q) | 0.65 |  | 8.97 *** |  |  |

*Notes*: Panel (a) presents an occupational transition matrix for foreign-born individuals who by 1895 resided in the same department of residence as in 1869. Each cell in this matrix shows the percentage and number (between brackets) of individuals in the linked sample in each occupational class in 1869 (rows) and 1895 (columns). Panel (b) presents the same matrix for foreign-born individuals who by 1895 resided in a different department of residence than in 1869. Occupations were classified based on the HISCLASS scheme. White-collar (HISCLASS 1–5), farmer (HISCLASS 8), skilled/semi-skilled (HISCLASS 6–7, 9) and unskilled (HISCLASS 10–12). Panel (c) reports summary measures of mobility. M (column 1) corresponds to the fraction of individuals off the main diagonal of the matrix. d(P, J ) and d(Q,J) (columns 2 and 3) correspond to the distance between matrices P and Q and a matrix representing full independence, respectively. d(P, Q) (column 4) represents the distance between matrices P and Q and d(P, Q)i (column 5) represents this same distance after excluding the elements of the main diagonal from each matrix. For each of these distances, I performed a test of the hypothesis that d(i, j) = 0. Significance levels are indicated by ∗∗∗p < 0.01, ∗∗p <0.05, ∗p<0.1.

*Sources*: Data are from the sample of linked census records, as described in the text and Online Appendix.

Table B.2

OCCUPATIONAL MOBILITY OF IMMIGRANTS, DECLARED UPON ARRIVAL (ROWS) AND IN 1895 CENSUS (COLUMNS). ITALY AND SPAIN

(a) Italians

| Declared upon Arrival | White Collar | Farmer | Skilled/ Semi-Skilled | Unskilled | Total |
| --- | --- | --- | --- | --- | --- |
| White collar | 0.49 | 0.06 | 0.34 | 0.11 | 100 |
|  | (34) | (4) | (24) | (8) | (70) |
| Farmer | 0.23 | 0.22 | 0.32 | 0.24 | 100 |
|  | (80) | (76) | (110) | (82) | (348) |
| Skilled/semi-skilled | 0.19 | 0.10 | 0.60 | 0.11 | 100 |
|  | (46) | (24) | (147) | (28) | (245) |
| Unskilled | 0.22 | 0.19 | 0.34 | 0.25 | 100 |
|  | (76) | (67) | (117) | (86) | (346) |
| Total | 0.23 | 0.17 | 0.39 | 0.20 | 100 |
|  | (236) | (171) | (398) | (204) | (1,009) |

(b) Spaniards

| Declared upon Arrival | White Collar | Farmer | Skilled/ Semi-Skilled | Unskilled | Total |
| --- | --- | --- | --- | --- | --- |
| White collar | 0.65 | 0.06 | 0.15 | 0.13 | 100 |
|  | (74) | (7) | (17) | (15) | (113) |
| Farmer | 0.33 | 0.16 | 0.25 | 0.26 | 100 |
|  | (100) | (49) | (77) | (81) | (307) |
| Skilled/semi-skilled | 0.30 | 0.16 | 0.32 | 0.22 | 100 |
|  | (44) | (24) | (48) | (33) | (149) |
| Unskilled | 0.33 | 0.14 | 0.32 | 0.22 | 100 |
|  | (78) | (34) | (76) | (52) | (249) |
| Total | 0.37 | 0.14 | 0.27 | 0.22 | 100 |
|  | (296) | (114) | (218) | (181) | (809) |

*Notes*: Each cell in the table shows the percentage and the number (between brackets) of individuals in the linked sample in each occupational class upon arrival to Argentina (rows) and in 1895 (columns). Panel (a) corresponds to Italian immigrants and Panel (b) to Spanish immigrants. Occupations were classified based on the HISCLASS scheme. White-collar (HISCLASS 1–5), farmer (HISCLASS 8), skilled/semi-skilled (HISCLASS 6–7, 9) and unskilled (HISCLASS 10–12).

*Sources*: Data are from the sample of linked census records, as described in the text and Online Appendix.

Table B.3

INTERGENERATIONAL MOBILITY OF NATIVES AND IMMIGRANTS, FATHERS IN 1869 (ROWS) AND SONS IN 1895 (COLUMNS). BUENOS AIRES, ENTRE RIOS AND SANTA FE

(a) Sons of Natives

| Fathers, 1869 | White Collar | Farmer | Skilled/ Semi-Skilled | Unskilled | Total |
| --- | --- | --- | --- | --- | --- |
| White collar | 0.55 | 0.16 | 0.13 | 0.15 | 100 |
|  | (491) | (145) | (116) | (137) | (889) |
| Farmer | 0.18 | 0.30 | 0.11 | 0.41 | 100 |
|  | (394) | (673) | (240) | (917) | (2,224) |
| Skilled/semi-skilled | 0.32 | 0.11 | 0.28 | 0.29 | 100 |
|  | (148) | (50) | (133) | (138) | (469) |
| Unskilled | 0.12 | 0.21 | 0.13 | 0.55 | 100 |
|  | (157) | (279) | (170) | (749) | (1,355) |
| Total | 0.24 | 0.23 | 0.13 | 0.39 | 100 |
|  | (1,190) | (1,147) | (659) | (1,941) | (4,937) |

(b) Sons of Immigrants

| Fathers, 1869 | White Collar | Farmer | Skilled/ Semi-Skilled | Unskilled | Total |
| --- | --- | --- | --- | --- | --- |
| White collar | 0.69 | 0.10 | 0.11 | 0.10 | 100 |
|  | (494) | (75) | (78) | (70) | (717) |
| Farmer | 0.19 | 0.51 | 0.11 | 0.18 | 100 |
|  | (84) | (223) | (50) | (80) | (437) |
| Skilled/semi-skilled | 0.48 | 0.10 | 0.29 | 0.12 | 100 |
|  | (376) | (79) | (228) | (97) | (780) |
| Unskilled | 0.35 | 0.18 | 0.20 | 0.26 | 100 |
|  | (148) | (77) | (83) | (109) | (417) |
| Total | 0.47 | 0.19 | 0.19 | 0.15 | 100 |
|  | (1,102) | (454) | (439) | (356) | (2,351) |

1. Counterfactual Distribution: Sons of Natives

|  | White Collar | Farmer | Skilled/ semi-Skilled | Unskilled | Total |
| --- | --- | --- | --- | --- | --- |
|  | 0.35 | 0.31 | 0.15 | 0.18 | 100 |

1. Summary Measures of Mobility

|  | M | d(P,J) | d(Q,J) | d(P,Q) | d(P, Q)i |
| --- | --- | --- | --- | --- | --- |
| (1) | (2) | (3) | (4) | (5) |
| Sons of natives (P) | 0.59 | 14.72 *** |  | 8.37 *** | 5.00 * |
| Sons of immigrants (Q) | 0.55 |  | 15.04 *** |  |  |

*Notes*: I restrict the sample to father-son pairs in which the father resided in the provinces of Buenos Aires –including the city of Buenos Aires-, Entre Rios or Santa Fe in 1869. Panel (a) presents an occupational transition matrix for sons of natives. Each cell in this matrix shows the percentage and the number (between brackets) of fathers in occupation i in 1869 with sons in occupation j in 1895. Panel (b) presents the same matrix for sons of immigrants. Panel (c) presents the counterfactual occupational distribution for sons of natives had they been exposed to the transition matrix of sons of immigrants. Occupations were classified based on the HISCLASS scheme. White-collar (HISCLASS 1–5), farmer (HISCLASS 8), skilled/semi- skilled (HISCLASS 6–7, 9) and unskilled (HISCLASS 10–12). Panel (d) reports summary measures of mobility based on the occupational transition matrices. M corresponds to the fraction of individuals off the main diagonal of the matrix. d(P, J ) and d(Q, J ) correspond to the distance between matrices P and Q and a matrix representing full independence, respectively. d(P, Q) represents the distance between matrices P and Q and d(P, Q)i represents this same distance after excluding the elements of the main diagonal from each matrix. For each of these distances, I performed a test of the hypothesis that d(i, j) = 0. Significance levels are indicated by ∗∗∗p < 0.01, ∗∗p < 0.05, ∗p < 0.1.

*Source*: Data are from the sample of linked census records, as described in the text and Online Appendix.

Table B.4

ETHNIC CAPITAL AND THE ECONOMIC OUTCOMES
OF THE SECOND-GENERATION

|  | Literacy | Earnings | Access to Property |
| --- | --- | --- | --- |
| (1) | (2) | (3) |
| Ethnic capital | 0.325** | 0.673*** | –0.300 |
|  | (0.144) | (0.213) | (0.198) |
| Observations | 23,509 | 22,248 | 24,277 |

*Notes*: ∗ ∗ ∗p < 0.01, ∗ ∗ p < 0.05, ∗p < 0.1. Robust standard errors clustered at the level of the father in parentheses. “Ethnic capital” is the average literacy rate–as measured in the 1869 census–among individuals from the same country of birth of the father. Each regression controls for a quartic in son’s and father’s age, own father’s literacy and enumeration district fixed effects, as determined by the place of residence of the family in 1869.

*Sources*: Data are from the sample of linked census records, as described in the text and Online Appendix.

1. This statement assumes that natives were a “closed” population. In particular, this statement will not be accurate if there are Argentine born individuals who lived abroad in 1869, but returned to the country in the intercensal period. Quantitatively, this factor is unlikely to matter as the number and fraction of Argentine individuals living abroad was probably very low—below 1 percent according to the 1895 census. [↑](#footnote-ref-1)
2. Assuming that immigrants had the same mortality rates than natives and that return migration was 30 percent in the intercensal period, I estimate that about 70 percent of the immigrants residing in Argentina in 1895 and in the relevant age cohort arrived after 1869. [↑](#footnote-ref-2)
3. Because the census cross section does not contain information on parental place of birth, it is not possible to distinguish between sons of natives and sons of immigrants in this comparison. In addition, it is not possible to distinguish in the 1895 census cross-section between those individuals who were residing with their father in 1869 and those who did not. [↑](#footnote-ref-3)
4. In assuming an 8 percent return to capital, I follow Álvarez and Nicolini (2010). [↑](#footnote-ref-4)
